# Supplementary material for: Information and Communication Technology Use and Economic Growth
Source: PLoS One. 2012 Nov 12;7(11):e48903. doi: 10.1371/journal.pone.0048903 (PMC3495961; doi:10.1371/journal.pone.0048903)
Supplement: Table S1 — ICT Use Index, 2000–2009. (XLSX) [file pone.0048903.s001.xlsx]

## Sheet: Sheet1
Table S1. ICT Use Index
Country / Year	2000	2001	2002	2003	2004	2005	2006	2007	2008	2009
Afghanistan	0.0376315	0.0376315	0.0376315	0.291056	0.84	1.61799	3.27686	5.8606	9.58131	14.0718
Albania	0.320484	4.27527	9.23615	11.9738	13.4143	16.2391	20.1894	25.0635	34.9796	46.2269
Algeria	0.147118	0.170574	0.472974	1.52855	5.03921	14.1387	21.057	27.3304	26.7274	32.2413
Angola	0.0596377	0.168317	0.324254	0.738169	1.59701	3.2888	6.10609	9.55159	12.6482	15.0977
Antigua and Barbuda	9.41219	10.4884	15.7548	18.7214	25.2917	41.2794	51.8053	47.7498	65.0833	66.0596
Argentina	6.8807	7.56032	7.34834	8.69001	14.1636	22.2526	31.1323	40.2368	45.9673	52.6958
Armenia	0.320107	0.489968	1.09291	1.9886	3.17919	3.46009	13.5481	20.2236	25.1409	28.1516
Australia	21.4877	26.5635	29.6456	33.631	38.2956	44.9174	52.6483	33.6427	58.1778	60.422
Austria	30.8554	33.5609	35.466	39.6448	44.4459	49.6798	56.0407	60.1299	62.3192	65.7313
Azerbaijan	1.72042	2.99282	3.31049	4.39832	5.97485	9.05116	13.2616	18.1997	26.6781	31.5545
Bahamas	4.31798	8.50034	16.1486	16.7869	23.7496	28.1122	30.9867	43.3426	42.6148	43.4621
Bahrain	11.5543	17.154	21.837	24.1022	33.6202	38.6945	45.7995	56.4924	70.1856	67.038
Bangladesh	0.0794718	0.134037	0.258709	0.321807	0.630889	1.96614	4.09276	7.20505	9.22418	10.6826
Barbados	3.73292	6.97352	12.7545	24.3002	32.5983	33.8047	39.2254	52.1646	47.9333	63.6514
Belarus	0.177372	0.482973	1.59346	3.79932	7.59866	13.9166	21.5715	30.5444	35.8757	45.0017
Belgium	22.7258	31.9054	35.853	40.2753	44.1522	48.2839	51.9742	56.7989	61.7453	64.8957
Belize	2.7692	5.67954	7.12442	8.20046	10.2533	12.9712	15.3509	15.3053	19.8319	19.7128
Benin	0.289587	0.618583	1.03684	1.0845	2.02112	2.53028	4.32679	8.11647	13.8599	18.6801
Bhutan	0.0438099	0.0741851	0.0884824	0.233856	1.15536	2.00817	4.36866	7.59194	12.6305	16.5991
Bolivia	2.47031	3.17585	4.08704	4.98505	6.8764	9.03835	10.6597	12.1594	16.8143	26.6672
Bosnia and Herzegovina	0.967732	4.05537	7.30722	9.39729	13.8521	15.6962	19.1324	25.0252	33.4915	35.4845
Botswana	4.54399	6.26978	6.18761	8.18695	9.50361	10.1644	14.6181	20.1872	25.9487	32.2039
Brazil	4.85123	6.12657	6.65059	8.72251	12.7194	17.019	19.9562	24.7125	30.7484	35.5738
Brunei Darussalam	9.40112	16.3746	16.2563	18.3265	20.9668	23.5783	29.1972	38.0362	43.0262	45.114
Bulgaria	3.04194	6.46533	10.8963	14.7356	20.5637	28.6858	40.1724	50.0699	55.456	57.5864
Burkina Faso	0.0803651	0.223661	0.316107	0.630776	1.00179	1.54234	2.38642	4.21606	6.62155	8.08284
Cambodia	0.348551	0.580424	0.965729	1.24373	2.10545	2.55174	4.06829	6.01791	9.70784	14.0823
Cameroon	0.223139	0.856762	1.40326	2.10204	2.92143	4.19892	5.72075	8.02378	10.6534	13.533
Canada	16.5636	22.4467	25.5837	29.0158	32.4938	38.3757	42.1109	45.6418	48.8262	51.0029
Cape Verde	1.66778	2.54631	3.40258	4.16411	5.0484	6.20693	9.15474	11.7558	19.7981	21.0058
Chad	0.0255266	0.0891192	0.131534	0.237184	0.427017	0.691714	1.4895	2.85286	5.46993	6.73245
Chile	8.56285	12.5009	15.2998	17.9768	22.2325	25.6275	30.7366	34.5815	36.5551	40.462
China	2.45686	4.71067	6.85839	9.08247	11.4556	13.2947	15.5709	18.4032	21.5299	25.3071
Colombia	2.08375	3.00139	4.15617	5.58969	8.86264	17.6837	23.9337	27.7739	33.5043	34.5322
Comoros	0.0293534	0.0381907	0.05127	0.160048	0.50863	0.897754	1.99993	3.41166	4.99164	6.18431
Congo	0.76208	1.59826	2.30817	3.34628	3.79927	5.39134	8.68527	11.9658	16.4947	19.4514
Congo (Democratic Republic of the)	0.00973849	0.0946752	0.346653	0.747904	1.15692	1.54876	2.41626	3.50575	5.13933	4.72782
Costa Rica	2.07555	3.25632	4.94034	7.22792	8.48678	8.96721	12.7332	13.4942	16.4234	18.1719
Cote d'Ivoire	0.921099	1.38482	1.89433	2.31333	2.95933	4.06309	6.84726	12.2739	16.7725	20.6706
Croatia	8.9359	15.3631	21.0638	23.0505	27.6914	35.631	43.78	51.0916	60.5523	64.8238
Cyprus	11.3407	15.8783	20.7151	26.0481	30.6581	36.5753	42.1247	49.5345	54.0145	58.6158
Czech Republic	15.3911	26.5594	33.2921	38.6252	43.1281	49.5582	50.569	55.6458	59.183	57.0009
Denmark	31.9114	39.3247	47.9881	46.8413	52.1991	57.8586	65.3991	69.8412	72.7589	75.1037
Djibouti	0.0605063	0.201791	0.715734	1.06903	1.56407	1.95334	1.97953	3.01777	4.78778	5.60091
Dominica	1.98209	5.74469	10.1306	16.4037	26.0048	28.211	38.4318	49.1423	57.8703	65.7022
Dominican Rep.	2.83361	4.90919	6.45838	7.89438	9.49454	13.3772	16.9559	20.5085	26.4523	31.7871
Ecuador	1.44848	2.51183	4.37167	6.50799	9.4083	16.2399	21.9142	25.7401	29.9959	35.3587
Egypt	0.639508	1.28912	2.07324	3.01543	3.86903	7.02143	8.81134	13.8365	18.2449	23.6706
El Salvador	4.42869	5.13019	5.41211	7.10514	10.9264	14.2145	21.8333	34.4883	39.1792	42.6526
Equatorial Guinea	0.340057	0.948319	1.93441	2.43345	3.44779	5.33371	6.34784	7.72317	9.02598	9.77401
Estonia	15.4009	18.7848	26.218	32.6406	40.5467	47.5571	57.1509	66.0258	81.6304	87.7827
Ethiopia	0.0101839	0.0154879	0.0281203	0.028378	0.0760955	0.189371	0.384625	0.521422	0.814693	1.64636
Fiji	2.41041	3.53299	3.95923	4.7972	6.14335	9.16483	11.8336	22.1527	24.475	26.23
Finland	28.0857	34.0386	38.2752	43.5829	48.7422	45.4758	50.4859	54.8101	59.2671	63.5534
France	19.436	24.9678	27.8	31.9248	36.6944	41.6954	47.3702	52.8619	56.6519	59.6545
Gabon	3.34439	4.0937	7.32137	7.72553	12.2469	18.0253	21.5412	27.4593	29.7074	30.8385
Gambia	0.230679	1.44805	2.37175	3.43022	3.90005	5.35383	8.49419	16.4308	23.1894	27.7417
Georgia	1.35443	2.12713	3.62737	5.17869	6.82754	10.0251	14.2964	20.9408	23.0999	25.2785
Germany	24.7852	29.5773	31.8914	35.7785	40.8533	46.9516	44.3032	51.7165	57.4681	58.8895
Greece	18.7092	24.8141	29.1259	28.3971	30.2147	34.0314	37.9449	45.2972	53.4969	54.6075
Grenada	2.3059	3.27097	4.01203	15.2181	14.3142	18.6242	20.1277	20.4865	27.9795	27.7302
Guatemala	2.51769	3.28803	4.41298	5.55354	8.43373	11.8274	18.3476	29.6362	36.3616	41.1491
Guinea	0.171401	0.235616	0.381976	0.455752	0.56542	0.676408	0	6.86422	9.22908	11.4351
Guinea-Bissau	0	0.0148534	0.00532906	0.0299883	0.905381	2.21456	3.4454	6.34335	10.4905	11.4943
Guyana	2.30528	4.15434	4.54012	7.06777	8.55257	14.3737	17.2713	23.4386	22.725	25.0245
Haiti	0.23659	0.380539	0.62652	1.34095	1.6933	1.75416	4.14033	8.82708	10.6922	11.9993
Honduras	0.923108	1.33693	1.76711	1.99775	3.56297	6.25885	10.6513	19.4141	28.2694	37.4073
Hong Kong	43.8274	47.0491	51.2194	57.1473	63.9172	66.8343	72.1986	79.7097	84.0502	89.7504
Hungary	10.6686	17.3034	24.4217	29.4512	33.2941	37.2748	43.5113	48.6092	55.1479	55.5746
Iceland	31.2086	36.733	34.7597	45.896	50.8601	55.8173	59.83	63.7531	64.8969	64.594
India	0.207228	0.314117	0.51354	1.14633	1.72107	2.89895	5.24702	7.14947	10.2943	15.2394
Indonesia	0.652668	1.13037	1.94547	3.00624	4.85211	7.36794	9.93604	14.1386	20.8907	23.2587
Iran	0.59826	1.21374	1.5046	1.65939	2.39345	3.96873	7.16932	13.7142	19.5807	23.6714
Iraq	0.0438585	0.0438585	0.0438585	0.0438585	0.0438585	0.0438585	0.0438585	0.0438585	0.0438585	21.1672
Ireland	26.1219	25.3389	34.547	39.1496	39.647	45.1836	51.4825	55.4751	56.9881	55.5607
Israel	28.2314	34.6924	40.0448	45.6568	51.9298	56.6325	61.3466	54.5096	63.1916	55.7184
Italy	27.8704	36.7947	39.3214	44.0477	49.6914	56.592	59.5071	66.1452	71.7794	59.8116
Jamaica	4.71628	7.6898	15.9311	19.9618	23.4411	25.4391	30.283	35.9275	36.4379	39.5406
Japan	22.4858	27.3832	32.8854	37.7033	32.1412	35.0379	37.2567	40.0237	42.0606	43.8967
Jordan	2.86192	6.18671	8.32399	8.97603	10.7079	20.0028	26.5859	28.5974	31.0403	34.471
Kazakhstan	0.435315	1.28824	2.27039	2.93187	5.69018	12.3899	17.5506	28.8199	35.531	39.2366
Kenya	0.175707	0.659603	1.18286	1.60263	2.47441	4.33126	6.78158	9.94594	13.893	16.0737
Korea (Rep. of)	27.2853	35.7615	42.6488	44.6153	47.6377	49.154	53.6419	57.5169	60.1581	62.9954
Kuwait	7.04912	12.5054	16.8364	21.7573	28.7926	31.8008	30.641	32.779	33.6168	43.6787
Kyrgyzstan	0.0777902	0.196233	0.375782	0.934977	1.74485	3.5372	8.02348	13.5392	21.1212	27.4481
Lao P.D.R.	0.0868048	0.186892	0.34016	0.670122	1.19925	3.72838	5.60036	8.07952	10.879	17.0433
Latvia	6.05082	9.89077	13.7187	18.4737	24.1291	29.4573	35.935	44.6833	41.868	45.0328
Lebanon	6.49978	7.33315	8.15505	8.75574	9.73171	11.6443	13.8618	14.6933	16.4747	21.5673
Lesotho	0.377438	0.982447	2.37866	2.15769	3.31728	4.17509	5.86562	7.40967	9.55575	10.564
Libya	0.246896	0.30239	0.414768	0.737228	2.8435	11.1433	21.9787	24.1594	25.4003	25.8075
Lithuania	5.44191	10.2438	16.9252	22.6907	33.0208	48.3077	55.6337	61.6652	65.5836	66.81
Luxembourg	24.7563	33.8106	40.7258	48.9419	46.3279	53.0404	70.8748	73.3267	75.6516	78.4803
Macao, China	13.0941	18.0798	25.3832	33.2627	40.5177	49.7198	59.0913	70.7867	78.9831	84.367
Madagascar	0.158111	0.335675	0.368956	0.607561	0.663341	0.973926	1.94665	3.96073	8.37783	10.5922
Malawi	0.152289	0.177076	0.261571	0.377822	0.592887	1.05574	1.45739	2.60199	4.20145	5.20113
Malaysia	9.61452	13.2029	15.9462	19.0931	24.3528	31.5477	31.8558	37.2339	42.9434	46.2807
Maldives	1.05431	2.3867	5.09224	7.94239	13.2394	24.1065	32.2306	37.6552	51.8859	54.1313
Malta	12.8649	25.9014	31.1751	33.6062	37.6595	40.8586	43.257	49.3192	53.0062	57.3141
Mauritania	0.20608	1.3615	2.98647	4.11527	5.95139	8.27064	11.4853	14.9957	21.6727	22.0351
Mauritius	5.938	8.63544	10.9894	14.0926	16.7978	20.9333	25.1643	27.019	30.674	34.3205
Mexico	5.05221	7.76385	9.1878	10.6378	13.7395	16.9855	20.2652	24.4913	29.171	33.0148
Moldova	1.22092	1.93035	2.93856	4.18791	7.01652	10.2545	13.2408	18.6404	25.1684	30.2203
Mongolia	2.24586	2.78351	3.05098	4.85921	6.30775	8.001	10.8897	15.2513	23.174	29.1506
Morocco	2.72337	5.45889	7.00046	8.21681	10.4607	14.144	18.2446	22.5202	25.1752	27.4206
Namibia	1.66448	2.1553	2.90286	4.0797	5.10752	8.36208	11.023	14.0726	16.308	18.5086
Nepal	0.0300207	0.0426202	0.054066	0.135003	0.181575	0.330122	1.45192	3.92763	4.81091	6.3274
Netherlands	35.4563	36.0449	38.064	43.9221	51.6977	57.1711	64.2707	68.3291	60.5094	73.8842
New Zealand	17.4867	25.1078	26.8353	28.9383	35.2973	41.9161	46.6273	56.0514	59.6725	59.9438
Nicaragua	0.692356	1.1709	1.60694	3.0419	4.70951	7.01908	11.2629	15.0294	18.4474	18.8635
Niger	0.0116551	0.0118365	0.167673	0.230848	0.458768	0.825647	1.17305	2.10235	4.26104	5.61291
Nigeria	0.0138442	0.0761579	0.408479	0.774057	2.19463	4.35409	7.39315	9.04404	13.7962	15.9446
Norway	32.6654	36.4046	40.2524	43.4463	50.6728	55.724	59.6739	63.1492	66.2169	55.4697
Oman	2.55365	4.91189	6.79364	8.44021	10.9975	17.7694	23.6565	31.5284	39.7231	47.7499
Pakistan	0.0981024	0.205074	0.361173	0.832706	1.42862	2.96445	7.19527	12.659	17.1138	17.9862
Panama	5.07037	5.88943	6.50913	8.32238	14.2002	18.9986	24.9851	33.823	43.2094	59.4818
Paraguay	5.24344	7.15837	10.0274	10.49	10.2516	10.9345	18.238	26.1501	31.9767	31.2404
Peru	1.79355	2.54281	3.39545	4.43109	6.17632	8.30369	12.8391	18.9463	25.3606	30.4074
Philippines	2.91152	5.27899	6.62459	9.45838	13.483	14.0591	17.1672	22.6035	26.8116	35.4088
Poland	6.59178	8.61915	13.5226	17.6318	23.3585	28.8789	38.7755	41.8387	48.6266	50.7632
Portugal	21.6433	26.1255	31.1483	37.191	41.5417	46.3906	50.3803	54.6115	54.641	64.7654
Qatar	7.02991	9.74734	13.8631	18.7126	22.6181	30.2835	35.2176	43.4012	51.2604	66.9867
Romania	3.72516	5.77404	8.28047	12.1112	17.1858	22.5331	29.4712	39.5721	48.1067	50.9807
Russia	0.844944	1.9835	4.43157	10.1145	20.2274	32.6623	41.7414	41.7011	50.1763	59.0316
Rwanda	0.165958	0.264006	0.326332	0.506179	0.531533	0.836341	1.15124	2.25114	4.54283	8.55257
Samoa	0.523347	0.650613	0.744499	1.94014	2.96235	4.4454	8.41819	15.8993	22.9263	27.9235
Saudi Arabia	2.49924	4.56005	8.45179	11.7575	14.5833	21.7181	29.6647	41.6651	51.8287	62.8477
Senegal	0.852289	1.00393	1.78729	2.47083	3.46367	5.20957	8.72145	10.3591	14.9071	18.5851
Seychelles	11.0826	15.6438	19.1675	20.8833	23.3324	25.6623	31.6016	34.4948	40.5577	48.1401
Singapore	30.5122	41.8747	46.3203	51.4135	56.1196	59.8086	63.5539	68.7687	66.1658	70.2107
Slovak Republic	8.04808	13.785	18.7917	23.9029	28.4251	31.4755	35.4904	45.2626	43.9907	46.5158
Slovenia	22.5318	29.1979	29.198	34.4226	39.4358	40.9745	44.3161	47.9405	52.7707	55.1761
South Africa	6.656	8.49677	10.5052	14.111	17.0327	23.5009	27.2886	28.8102	30.3705	31.1085
Spain	22.6326	27.6491	31.6223	35.812	38.4833	43.9285	48.7923	52.6872	55.034	56.7718
Sri Lanka	0.827676	1.27442	1.74335	2.55208	3.8268	5.93368	9.35401	13.7621	18.9152	23.8523
St. Vincent and the Grenadines	1.53592	3.33048	4.6065	20.8122	23.7909	24.8245	31.3776	40.0446	47.0159	45.963
Sudan	0.0217454	0.0960807	0.172926	0.468435	0.914149	1.56057	3.94766	6.76525	9.62986	12.1867
Suriname	3.17531	6.39634	7.83125	11.8244	14.7083	15.9526	21.7278	25.638	27.9689	50.2104
Swaziland	1.16144	1.85785	2.33745	2.94886	4.82419	6.47139	7.86743	10.8911	15.6244	18.9518
Sweden	33.6523	40.7583	45.7849	51.0255	52.7944	60.4073	62.8293	66.0075	68.5215	70.7388
Switzerland	29.3886	35.1929	40.0277	45.9868	47.1833	54.1124	60.3507	65.7799	69.6525	72.0863
Syria	0.0799474	0.428049	0.895102	2.40259	4.46912	5.47168	8.3257	11.065	12.1068	16.3084
Tajikistan	0.00657018	0.00930882	0.0703766	0.248746	0.690516	1.33832	10.7061	10.4917	17.7627	23.2587
Thailand	1.93511	3.95672	5.2795	11.2023	13.9038	15.6687	20.2065	27.4889	31.9358	34.0424
Togo	0.352169	0.641206	1.05265	1.48325	1.87816	2.38814	3.80218	6.57898	8.26548	11.2257
Tonga	0.463935	0.547103	1.61192	4.21607	6.0834	10.5881	10.6726	16.4971	17.8856	17.3517
Trinidad and Tobago	4.79849	7.30524	7.63892	9.61278	17.7919	25.2101	40.7577	41.0116	51.0472	54.2505
Tunisia	0.544025	1.55241	2.2327	6.83308	13.0156	19.5768	25.1243	27.058	30.0568	34.8019
Turkey	8.75573	9.5858	11.2697	14.0012	17.4662	22.4941	27.6796	33.8018	36.2691	35.2052
Uganda	0.178977	0.378893	0.506763	0.961137	1.39351	1.52496	2.25014	4.53881	8.9491	9.50732
Ukraine	0.552716	1.51566	2.69457	5.4722	11.3836	23.8908	35.3648	41.3116	43.2416	44.1574
United Arab Emirates	16.7234	21.0678	25.2373	29.5373	35.2127	42.5983	51.4875	70.0887	84.5243	94.9182
United Kingdom	29.1087	32.4737	35.4351	40.8648	47.0003	53.8256	59.2301	64.021	67.2354	69.6625
United States	13.9021	23.4535	19.6351	29.8826	27.1943	32.5117	36.9401	48.151	42.1988	52.7344
Uruguay	4.08192	5.15785	5.09261	4.93705	6.40115	13.9981	26.5933	34.4775	40.9682	48.2479
Uzbekistan	0.0759388	0.177453	0.266458	0.465452	0.701596	0.920032	5.26387	9.49311	18.1488	23.1737
Venezuela	7.74467	9.07368	9.10226	9.6358	11.5996	16.9487	24.8128	31.3255	35.7208	36.7664
Viet Nam	0.373656	0.622056	0.919931	1.43426	2.66581	5.04363	9.23402	20.0901	32.201	38.8125
Yemen	0.0697308	0.272981	0.858867	1.17537	2.50514	3.7502	4.78617	6.79197	9.78349	12.398
Zambia	0.330931	0.398511	0.453602	0.709335	1.33691	2.67065	4.60229	7.12387	9.32595	11.3214
